# Supplementary material for: Scalable Deposition of Nanomaterial-Based Temperature Sensors for Transparent and Pervasive Electronics
Source: Hindawi journal article supplement (doi:10.1155/2018/7102069), 2018-10-31
Supplement: f1 [file 7102069.f1.pdf]

# Supporting Information

## Scalable deposition of nanomaterial-based temperature sensors for transparent and pervasive electronics

Andreas Albrecht, Almudena Rivadeneyra, Marco Bobinger, Jacopo Bonaccini Calia, Florin C. Loghin, Jose F. Salmeron, Markus Becherer, Paolo Lugli, and Aniello Falco

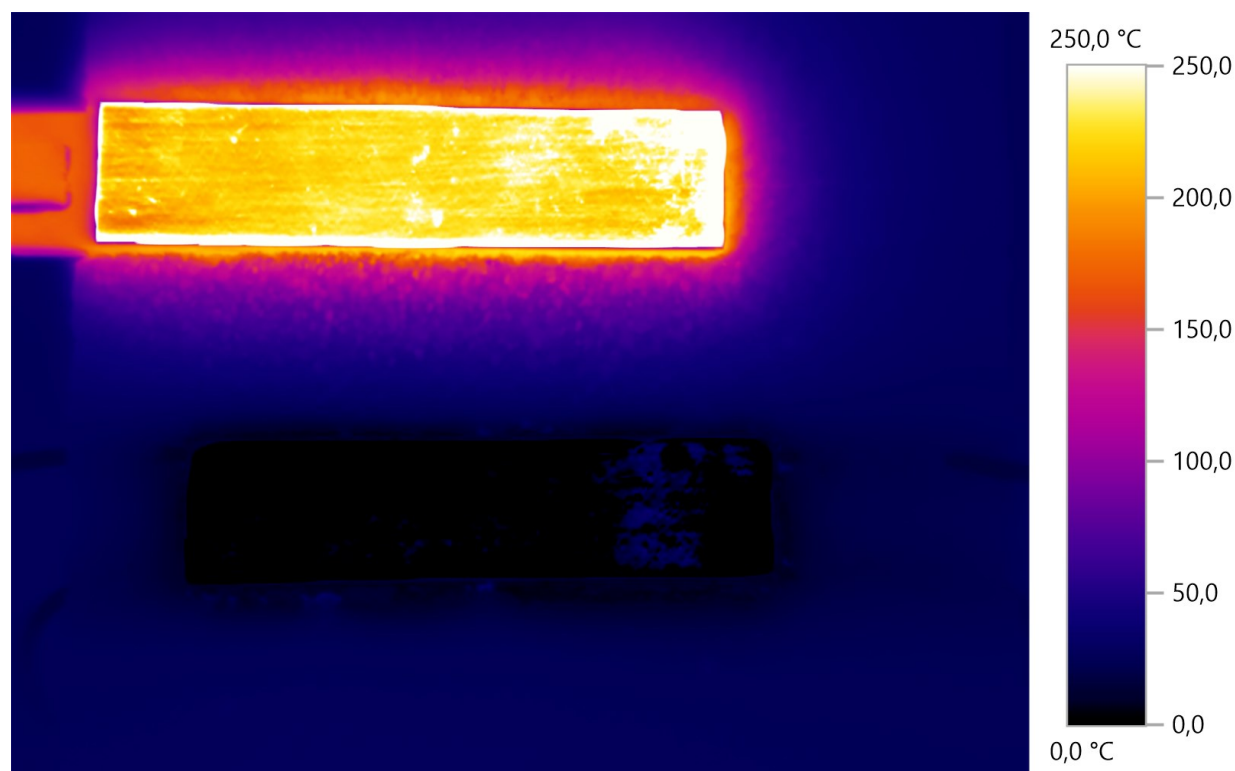

Figure S1. Composition of two thermal images to compensate the two distinctly different thermal emission coefficients of foam glass (0.9) and aluminum (0.08) on the heater (top, bright) and cooler (bottom, dark). The value for the aluminum plates was experimentally evaluated and found to match the predicted range (0.08-0.09). The transition of the emission coefficients at the edges of the aluminum plates was neglected. In reality, a smooth transition between the about 225 °C hot heater, the about 25 °C warm foam glass and the about 5 °C cold heater has to be assumed.
